# Supplementary material for: Plasma thrombin-activatable fibrinolysis inhibitor and the 1040C/T polymorphism are risk factors for diabetic kidney disease in Chinese patients with type 2 diabetes
Source: PeerJ. 2023 Nov 14;11:e16352. doi: 10.7717/peerj.16352 (PMC10655703; doi:10.7717/peerj.16352)
Supplement: Supplemental Information 1 [file peerj-11-16352-s001.xlsx]

## Sheet: Original results of 1040C-T
Genes	Allele 1-stain	Allele 2-stain	Identified results	Genotype	Allele 1-CT value	Allele 2-CT value	Patients No.
rs1926447	FAM(C)	VIC(T)	Allele 1	GG	30.12	-	1
rs1926447	FAM(C)	VIC(T)	heterozygosis	GA	29	26.12	2
rs1926447	FAM(C)	VIC(T)	heterozygosis	GA	27.97	25.47	3
rs1926447	FAM(C)	VIC(T)	heterozygosis	GA	27.97	25.34	4
rs1926447	FAM(C)	VIC(T)	Allele 1	GG	27.15	-	5
rs1926447	FAM(C)	VIC(T)	heterozygosis	GA	29.54	26.62	6
rs1926447	FAM(C)	VIC(T)	Allele 1	GG	27.76	-	7
rs1926447	FAM(C)	VIC(T)	Allele 1	GG	33.57	-	8
rs1926447	FAM(C)	VIC(T)	heterozygosis	GA	33.14	30.34	9
rs1926447	FAM(C)	VIC(T)	Allele 1	GG	31.71	-	10
rs1926447	FAM(C)	VIC(T)	Allele 1	GG	29.38	-	11
rs1926447	FAM(C)	VIC(T)	Allele 1	GG	30.52	-	12
rs1926447	FAM(C)	VIC(T)	Allele 1	GG	28.53	-	13
rs1926447	FAM(C)	VIC(T)	Allele 1	GG	28.68	-	14
rs1926447	FAM(C)	VIC(T)	Allele 1	GG	27.68	-	15
rs1926447	FAM(C)	VIC(T)	Allele 1	GG	27.45	-	16
rs1926447	FAM(C)	VIC(T)	Allele 1	GG	30.97	-	17
rs1926447	FAM(C)	VIC(T)	Allele 1	GG	27.08	-	18
rs1926447	FAM(C)	VIC(T)	heterozygosis	GA	29.74	26.89	19
rs1926447	FAM(C)	VIC(T)	heterozygosis	GA	30.11	27.52	20
rs1926447	FAM(C)	VIC(T)	Allele 1	GG	29.19	-	21
rs1926447	FAM(C)	VIC(T)	Allele 1	GG	26.31	-	22
rs1926447	FAM(C)	VIC(T)	Allele 1	GG	25.93	-	23
rs1926447	FAM(C)	VIC(T)	heterozygosis	GA	24.72	22.05	24
rs1926447	FAM(C)	VIC(T)	Allele 1	GG	27.05	-	25
rs1926447	FAM(C)	VIC(T)	Allele 1	GG	27.02	-	26
rs1926447	FAM(C)	VIC(T)	Allele 1	GG	27.28	-	27
rs1926447	FAM(C)	VIC(T)	heterozygosis	GA	28.06	22.34	28
rs1926447	FAM(C)	VIC(T)	heterozygosis	GA	30.26	27.22	29
rs1926447	FAM(C)	VIC(T)	heterozygosis	GA	33.85	31.05	30
rs1926447	FAM(C)	VIC(T)	Allele 1	GG	28.72	-	31
rs1926447	FAM(C)	VIC(T)	heterozygosis	GA	29.88	27.33	32
rs1926447	FAM(C)	VIC(T)	heterozygosis	GA	30.1	27.91	33
rs1926447	FAM(C)	VIC(T)	Allele 1	GG	27.83	-	34
rs1926447	FAM(C)	VIC(T)	Allele 1	GG	29.92	-	35
rs1926447	FAM(C)	VIC(T)	Allele 1	GG	25.79	-	36
rs1926447	FAM(C)	VIC(T)	Allele 1	GG	25.37	-	37
rs1926447	FAM(C)	VIC(T)	Allele 1	GG	27.35	-	38
rs1926447	FAM(C)	VIC(T)	heterozygosis	GA	30.22	28.71	39
rs1926447	FAM(C)	VIC(T)	Allele 1	GG	29.7	-	40
rs1926447	FAM(C)	VIC(T)	heterozygosis	GA	25.78	23.43	41
rs1926447	FAM(C)	VIC(T)	heterozygosis	GA	25.47	22.88	42
rs1926447	FAM(C)	VIC(T)	heterozygosis	GA	26.84	24.23	43
rs1926447	FAM(C)	VIC(T)	Allele 1	GG	24.1	-	44
rs1926447	FAM(C)	VIC(T)	Allele 1	GG	27.82	-	45
rs1926447	FAM(C)	VIC(T)	Allele 1	GG	24.95	-	46
rs1926447	FAM(C)	VIC(T)	Allele 1	GG	28.8	-	47
rs1926447	FAM(C)	VIC(T)	Allele 1	GG	24.78	-	48
rs1926447	FAM(C)	VIC(T)	Allele 1	GG	29.66	-	49
rs1926447	FAM(C)	VIC(T)	Allele 1	GG	27.06	-	50
rs1926447	FAM(C)	VIC(T)	Allele 1	GG	28.23	-	51
rs1926447	FAM(C)	VIC(T)	Allele 1	GG	26.95	-	52
rs1926447	FAM(C)	VIC(T)	heterozygosis	GA	35.67	33.66	53
rs1926447	FAM(C)	VIC(T)	heterozygosis	GA	31.32	28.57	54
rs1926447	FAM(C)	VIC(T)	Allele 1	GG	28.29	-	55
rs1926447	FAM(C)	VIC(T)	Allele 1	GG	28.95	-	56
rs1926447	FAM(C)	VIC(T)	Allele 1	GG	31.22	-	57
rs1926447	FAM(C)	VIC(T)	Allele 1	GG	30.59	-	58
rs1926447	FAM(C)	VIC(T)	Allele 1	GG	29.48	-	59
rs1926447	FAM(C)	VIC(T)	heterozygosis	GA	27.81	25.27	60
rs1926447	FAM(C)	VIC(T)	heterozygosis	GA	29.86	27.39	61
rs1926447	FAM(C)	VIC(T)	Allele 1	GG	27.73	-	62
rs1926447	FAM(C)	VIC(T)	Allele 1	GG	33.25	-	63
rs1926447	FAM(C)	VIC(T)	Allele 1	GG	28.29	-	64
rs1926447	FAM(C)	VIC(T)	Allele 1	GG	28.67	-	65
rs1926447	FAM(C)	VIC(T)	Allele 2	AA	-	26.27	66
rs1926447	FAM(C)	VIC(T)	heterozygosis	GA	30.24	27.72	67
rs1926447	FAM(C)	VIC(T)	Allele 1	GG	27.82	-	68
rs1926447	FAM(C)	VIC(T)	heterozygosis	GA	32.81	30.02	69
rs1926447	FAM(C)	VIC(T)	Allele 1	GG	30.92	-	70
rs1926447	FAM(C)	VIC(T)	heterozygosis	GA	32.99	30.24	71
rs1926447	FAM(C)	VIC(T)	Allele 1	GG	30.13	-	72
rs1926447	FAM(C)	VIC(T)	Allele 1	GG	31.83	-	73
rs1926447	FAM(C)	VIC(T)	Allele 1	GG	28.87	-	74
rs1926447	FAM(C)	VIC(T)	heterozygosis	GA	29.76	27.5	75
rs1926447	FAM(C)	VIC(T)	Allele 1	GG	29.6	-	76
rs1926447	FAM(C)	VIC(T)	Allele 1	GG	30.03	-	77
rs1926447	FAM(C)	VIC(T)	heterozygosis	GA	30.51	27.87	78
rs1926447	FAM(C)	VIC(T)	Allele 1	GG	35.31	-	79
rs1926447	FAM(C)	VIC(T)	Allele 2	AA	-	27.89	80
rs1926447	FAM(C)	VIC(T)	Allele 1	GG	27.98	-	81
rs1926447	FAM(C)	VIC(T)	Allele 1	GG	28.39	-	82
rs1926447	FAM(C)	VIC(T)	heterozygosis	GA	32.11	29.67	83
rs1926447	FAM(C)	VIC(T)	Allele 1	GG	30.22	-	84
rs1926447	FAM(C)	VIC(T)	heterozygosis	GA	30.35	27.83	85
rs1926447	FAM(C)	VIC(T)	Allele 1	GG	29.6	-	86
rs1926447	FAM(C)	VIC(T)	Allele 1	GG	28.4	-	87
rs1926447	FAM(C)	VIC(T)	Allele 2	AA	-	26.86	88
rs1926447	FAM(C)	VIC(T)	heterozygosis	GA	31.32	28.42	89
rs1926447	FAM(C)	VIC(T)	Allele 1	GG	30.37	-	90
rs1926447	FAM(C)	VIC(T)	heterozygosis	GA	29.35	26.95	91
rs1926447	FAM(C)	VIC(T)	Allele 1	GG	29.55	-	92
rs1926447	FAM(C)	VIC(T)	Allele 1	GG	27.53	-	93
rs1926447	FAM(C)	VIC(T)	Allele 1	GG	28.91	-	94
rs1926447	FAM(C)	VIC(T)	Allele 1	GG	31.11	-	95
rs1926447	FAM(C)	VIC(T)	Allele 1	GG	30.95	-	96
rs1926447	FAM(C)	VIC(T)	Allele 1	GG	22.74	-	97
rs1926447	FAM(C)	VIC(T)	Allele 1	GG	21.95	-	98
rs1926447	FAM(C)	VIC(T)	Allele 1	GG	23.44	-	99
rs1926447	FAM(C)	VIC(T)	Allele 1	GG	21.35	-	100
rs1926447	FAM(C)	VIC(T)	Allele 1	GG	27.73	-	101
rs1926447	FAM(C)	VIC(T)	Allele 1	GG	32.79	-	102
rs1926447	FAM(C)	VIC(T)	heterozygosis	GA	31.31	30.58	103
rs1926447	FAM(C)	VIC(T)	Allele 1	GG	27.91	-	104
rs1926447	FAM(C)	VIC(T)	heterozygosis	GA	31.92	31.16	105
rs1926447	FAM(C)	VIC(T)	Allele 1	GG	30.5	-	106
rs1926447	FAM(C)	VIC(T)	Allele 1	GG	29.57	-	107
rs1926447	FAM(C)	VIC(T)	heterozygosis	GA	32.03	29.88	108
rs1926447	FAM(C)	VIC(T)	Allele 1	GG	28.62	-	109
rs1926447	FAM(C)	VIC(T)	heterozygosis	GA	33.46	32.25	110
rs1926447	FAM(C)	VIC(T)	heterozygosis	GA	32.43	31.93	111
rs1926447	FAM(C)	VIC(T)	Allele 1	GG	28.42	-	112
rs1926447	FAM(C)	VIC(T)	Allele 1	GG	24.14	-	113
rs1926447	FAM(C)	VIC(T)	Allele 1	GG	32.22	-	114
rs1926447	FAM(C)	VIC(T)	Allele 2	AA	-	32.68	115
rs1926447	FAM(C)	VIC(T)	Allele 1	GG	30.63	-	116
rs1926447	FAM(C)	VIC(T)	heterozygosis	GA	29.26	28.21	117
rs1926447	FAM(C)	VIC(T)	heterozygosis	GA	29.32	28.29	118
rs1926447	FAM(C)	VIC(T)	Allele 2	AA	-	25.62	119
rs1926447	FAM(C)	VIC(T)	Allele 1	GG	28.63	-	120
rs1926447	FAM(C)	VIC(T)	Allele 1	GG	28.19	-	121
rs1926447	FAM(C)	VIC(T)	heterozygosis	GA	26.93	28.04	122
rs1926447	FAM(C)	VIC(T)	heterozygosis	GA	28.11	29.27	123
rs1926447	FAM(C)	VIC(T)	Allele 1	GG	26.82	-	124
rs1926447	FAM(C)	VIC(T)	Allele 1	GG	29.77	-	125
rs1926447	FAM(C)	VIC(T)	Allele 1	GG	30.93	-	126
rs1926447	FAM(C)	VIC(T)	Allele 1	GG	29.65	-	127
rs1926447	FAM(C)	VIC(T)	Allele 1	GG	28.65	-	128
rs1926447	FAM(C)	VIC(T)	Allele 1	GG	26.04	-	129
rs1926447	FAM(C)	VIC(T)	Allele 1	GG	23.93	-	130
rs1926447	FAM(C)	VIC(T)	Allele 1	GG	29.06	-	131
rs1926447	FAM(C)	VIC(T)	Allele 1	GG	23.72	-	132
rs1926447	FAM(C)	VIC(T)	heterozygosis	GA	31.32	31.99	133
rs1926447	FAM(C)	VIC(T)	Allele 1	GG	33.16	-	134
rs1926447	FAM(C)	VIC(T)	Allele 1	GG	27.64	-	135
rs1926447	FAM(C)	VIC(T)	heterozygosis	GA	32.12	33.76	136
rs1926447	FAM(C)	VIC(T)	Allele 1	GG	29.78	-	137
rs1926447	FAM(C)	VIC(T)	heterozygosis	GA	32.5	31.33	138
rs1926447	FAM(C)	VIC(T)	Allele 1	GG	31.64	-	139
rs1926447	FAM(C)	VIC(T)	Allele 1	GG	23.03	-	140
rs1926447	FAM(C)	VIC(T)	Allele 1	GG	23.48	-	141
rs1926447	FAM(C)	VIC(T)	heterozygosis	GA	31.3	30.48	142
rs1926447	FAM(C)	VIC(T)	Allele 1	GG	23.5	-	143
rs1926447	FAM(C)	VIC(T)	heterozygosis	GA	29.51	28.61	144
rs1926447	FAM(C)	VIC(T)	Allele 1	GG	33.77	-	145
rs1926447	FAM(C)	VIC(T)	Allele 2	AA	-	28.46
rs1926447	FAM(C)	VIC(T)	heterozygosis	GA	29.83	27.43
rs1926447	FAM(C)	VIC(T)	Allele 1	GG	26.27	-

## Sheet: Three genes grouping
Patients No.	Grop A=1040C/T	Grouping(1:GG,2:AA;1:GA）	Group B=438G/A	Grouping (1:AA；2:GG,3:GA;）	Group C=505G/A	Grouping (3:CC,2:TT;1:CT）	Diagnosis (1；T2D；2：DKD；3：DPN; 4:DMC)	Grouping (0:T2D; 1:DMA)
1	GG	1	GG	1	CC	3	4	1
2	GA	3	GG	1	CC	3	2	1
3	GA	3	GA	2	CC	3	4	1
4	GA	3	GG	1	CC	3	3	1
5	GG	1	GG	1	CC	3	4	1
6	GA	3	GG	1	CT	1	4	1
7	GG	1	GG	1	CT	1	4	1
8	GG	1	GG	1	CT	1	4	1
9	GA	3	GG	1	CC	3	4	1
10	GG	1	GG	1	CC	3	1	0
11	GG	1	GG	1	CT	1	4	1
12	GG	1	GG	1	CC	3	4	1
13	GG	1	GG	1	CC	3	4	1
14	GG	1	GG	1	CT	1	4	1
15	GG	1	GG	1	CC	3	1	0
16	GG	1	GG	1	CT	1	4	1
17	GG	1	GG	1	CT	1	1	0
18	GG	1	GG	1	CC	3	4	1
19	GA	3	GA	2	CC	3	1	0
20	GA	3	GA	2	CC	3	2	1
21	GG	1	GG	1	TT	2	4	1
22	GG	1	GG	1	CT	1	4	1
23	GG	1	GG	1	CC	3	1	0
24	GA	3	GG	1	CC	3	4	1
25	GG	1	GG	1	CT	1	4	1
26	GG	1	GG	1	CT	1	1	0
27	GG	1	GG	1	CT	1	1	0
28	GA	3	GG	1	CC	3	2	1
29	GA	3	GA	2	CT	1	1	0
30	GA	3	GA	2	CC	3	1	0
31	GG	1	GG	1	CT	1	4	1
32	GA	3	GG	1	CC	3	2	1
33	GA	3	GA	2	CC	3	2	1
34	GG	1	GG	1	TT	2	1	0
35	GG	1	GG	1	CC	3	1	0
36	GG	1	GG	1	CC	3	1	0
37	GG	1	GG	1	TT	2	1	0
38	GG	1	GG	1	CT	1	1	0
39	GA	3	GG	1	CT	1	2	1
40	GG	1	GG	1	CC	3	1	0
41	GA	3	GA	2	CC	3	3	1
42	GA	3	GA	2	CC	3	2	1
43	GA	3	GA	2	CC	3	1	0
44	GG	1	GG	1	CT	1	1	0
45	GG	1	GG	1	CC	3	1	0
46	GG	1	GG	1	CC	3	1	0
47	GG	1	GG	1	CT	1	1	0
48	GG	1	GG	1	CT	1	1	0
49	GG	1	GG	1	CC	3	1	0
50	GG	1	GG	1	CC	3	4	1
51	GG	1	GG	1	CC	3	1	0
52	GG	1	GG	1	CC	3	1	0
53	GA	3	GA	2	CT	1	2	1
54	GA	3	GA	2	CT	1	4	1
55	GG	1	GG	1	CT	1	4	1
56	GG	1	GG	1	CC	3	4	1
57	GG	1	GA	2	CC	3	1	0
58	GG	1	GG	1	CT	1	1	0
59	GG	1	GG	1	CC	3	4	1
60	GA	3	GG	1	CC	3	4	1
61	GA	3	GA	2	CT	1	2	1
62	GG	1	GG	1	CC	3	2	1
63	GG	1	GG	1	CC	3	2	1
64	GG	1	GG	1	CT	1	1	0
65	GG	1	GA	2	CC	3	1	0
66	AA	2	GA	2	CT	1	1	0
67	GA	3	GG	1	CC	3	2	1
68	GG	1	GG	1	CT	1	1	0
69	GA	3	GA	2	CC	3	2	1
70	GG	1	GG	1	CT	1	3	1
71	GA	3	GA	2	CT	1	3	1
72	GG	1	GG	1	CC	3	2	1
73	GG	1	GG	1	CT	1	2	1
74	GG	1	GG	1	CC	3	4	1
75	GA	3	GA	2	CT	1	2	1
76	GG	1	GG	1	CC	3	2	1
77	GG	1	GG	1	CT	1	2	1
78	GA	3	GA	2	CC	3	2	1
79	GG	1	GG	1	CC	3	2	1
80	AA	2	AA	3	CC	3	3	1
81	GG	1	GG	1	TT	2	2	1
82	GG	1	GG	1	CC	3	2	1
83	GA	3	GA	2	CC	3	3	1
84	GG	1	GG	1	TT	2	4	1
85	GA	3	GA	2	CC	3	2	1
86	GG	1	GG	1	CT	1	2	1
87	GG	1	GG	1	CC	3	3	1
88	AA	2	AA	3	CC	3	4	1
89	GA	3	GA	2	CC	3	3	1
90	GG	1	GG	1	CT	1	3	1
91	GA	3	GA	2	CC	3	2	1
92	GG	1	GG	1	CC	3	3	1
93	GG	1	GG	1	CT	1	4	1
94	GG	1	GG	1	CC	3	3	1
95	GG	1	GG	1	CT	1	2	1
96	GG	1	GG	1	CC	3	2	1
97	GG	1	GG	1	CT	1	3	1
98	GG	1	GG	1	CT	1	2	1
99	GG	1	GG	1	CT	1	2	1
100	GG	1	GG	1	CC	3	3	1
101	GG	1	GG	1	CC	3	2	1
102	GG	1	GG	1	TT	2	3	1
103	GA	3	GG	1	CC	3	2	1
104	GG	1	GG	1	CC	3	3	1
105	GA	3	GA	2	CC	3	3	1
106	GG	1	GG	1	CC	3	2	1
107	GG	1	GG	1	CT	1	4	1
108	GA	3	GG	1	CC	3	2	1
109	GG	1	GG	1	CC	3	2	1
110	GA	3	GA	2	CC	3	4	1
111	GA	3	GA	2	CC	3	2	1
112	GG	1	GG	1	CT	1	2	1
113	GG	1	GG	1	CT	1	2	1
114	GG	1	GG	1	CC	3	2	1
115	AA	2	AA	3	CC	3	2	1
116	GG	1	GG	1	CC	3	2	1
117	GA	3	GA	2	CC	3	3	1
118	GA	3	GA	2	CC	3	2	1
119	AA	2	AA	3	CC	3	2	1
120	GG	1	GG	1	CC	3	2	1
121	GG	1	GG	1	TT	2	2	1
122	GA	3	GA	2	CC	3	2	1
123	GA	3	GA	2	CC	3	2	1
124	GG	1	GG	1	CT	1	2	1
125	GG	1	GG	1	CC	3	2	1
126	GG	1	GG	1	TT	2	3	1
127	GG	1	GG	1	TT	2	2	1
128	GG	1	GA	2	CC	3	2	1
129	GG	1	GG	1	CT	1	2	1
130	GG	1	GG	1	CT	1	2	1
131	GG	1	GG	1	TT	2	2	1
132	GG	1	GG	1	CC	3	3	1
133	GA	3	GA	2	CC	3	2	1
134	GG	1	GG	1	CC	3	3	1
135	GG	1	GG	1	CC	3	2	1
136	GA	3	GG	1	CC	3	2	1
137	GG	1	GG	1	CT	1	3	1
138	GA	3	GA	2	CT	1	2	1
139	GG	1	GG	1	CC	3	2	1
140	GG	1	GG	1	CT	1	2	1
141	GG	1	GG	1	CC	3	2	1
142	GA	3	GG	1	CC	3	2	1
143	GG	1	GA	2	CT	1	2	1
144	GA	3	GG	1	CC	3	2	1
145	GG	1	GA	2	CC	3	3	1

## Sheet: T2D-1040TC-TAFI
Sequence No.	1040C/T	Grouping	TAFI	Diagnosis(1:T2D)
52	GG	3	3.113	1
57	GG	3	4.18252	1
10	GG	3	4.86822	1
15	GG	3	3.76133	1
17	GG	3	4.63577	1
23	GG	3	3.39176	1
26	GG	3	3.35189	1
27	GG	3	3.30207	1
34	GG	3	4.25289	1
35	GG	3	4.09211	1
36	GG	3	4.98971	1
37	GG	3	3.29211	1
38	GG	3	4.00179	1
40	GG	3	4.72666	1
44	GG	3	3.48153	1
45	GG	3	2.55787	1
46	GG	3	3.21247	1
47	GG	3	4.40385	1
48	GG	3	4.03189	1
49	GG	3	4.74687	1
51	GG	3	3.44162	1
58	GG	3	3.91155	1
64	GG	3	4.16242	1
65	GG	3	3.31203	1
68	GG	3	3.81138	1
66	AA	1	3.59	1

## Sheet: DKD-1040TC-TAFI
Sequence No.	1040C/T	Grouping	TAFI	Diagnosis(2:DKD)				1040C/T	Grouping	TAFI-DKD(CT)		1040C/T	Grouping	TAFI-DKD(CC+TT)		1040C/T	Grouping	TAFI-T2D(CC+TT)
2	GA	2	5.27716	2				GA	2	5.27716		GG	3	6.00021		GG	2	3.113
20	GA	2	5.21711	2				GA	2	5.21711		GG	3	6.48484		GG	2	4.18252
33	GA	2	6.08084	2				GA	2	6.08084		GG	3	5.73857		GG	3	4.86822
42	GA	2	6.80908	2				GA	2	6.80908		GG	3	5.27716		GG	3	3.76133
53	GA	2	6.70766	2				GA	2	6.70766		GG	3	4.12205		GG	3	4.63577
61	GA	2	5.23712	2				GA	2	5.23712		GG	3	3.0575		GG	3	3.39176
67	GA	2	6.14135	2				GA	2	6.14135		GG	3	4.99723		GG	3	3.35189
69	GA	2	7.46033	2				GA	2	7.46033		GG	3	4.26082		GG	3	3.30207
75	GA	2	4.79771	2				GA	2	4.79771		GG	3	4.00325		GG	3	4.25289
78	GA	2	5.55779	2				GA	2	5.55779		GG	3	14.7807		GG	3	4.09211
85	GA	2	4.00325	2				GA	2	4.00325		GG	3	4.57866		GG	3	4.98971
91	GA	2	4.00325	2				GA	2	4.00325		GG	3	4.69809		GG	3	3.29211
103	GA	2	6.22208	2				GA	2	6.22208		GG	3	4.69809		GG	3	4.00179
108	GA	2	4.45936	2				GA	2	4.45936		GG	3	5.09712		GG	3	4.72666
111	GA	2	4.33506	2				GA	2	4.33506		GG	3	5.19711		GG	3	3.48153
118	GA	2	4.7898	2				GA	2	4.7898		GG	3	8.19739		GG	3	2.55787
122	GA	2	3.72091	2				GA	2	3.72091		GG	3	5.09712		GG	3	3.21247
123	GA	2	6.02669	2				GA	2	6.02669		GG	3	1.44601		GG	3	4.40385
133	GA	2	11.2291	2				GA	2	11.2291		GG	3	2.62115		GG	3	4.03189
136	GA	2	6.21703	2				GA	2	6.21703		GG	3	6.35396		GG	3	4.74687
138	GA	2	3.36214	2				GA	2	3.36214		GG	3	5.8917		GG	3	3.44162
142	GA	2	8.56507	2				GA	2	8.56507		GG	3	4.73876		GG	3	3.91155
144	GA	2	5.07287	2				GA	2	5.07287		GG	3	5.28119		GG	3	4.16242
28	GA	2	9.24954	2				GA	2	9.24954		GG	3	4.36005		GG	3	3.31203
32	GA	2	6.84968	2				GA	2	6.84968		GG	3	5.28119		GG	3	3.81138
39	GA	2	5.73857	2				GA	2	5.73857		GG	3	3.91524		AA	3	3.59
62	GG	3	6.00021	2								GG	3	4.11163
63	GG	3	6.48484	2								GG	3	2.94125
72	GG	3	5.73857	2								GG	3	6.60248
73	GG	3	5.27716	2								GG	3	2.26311
76	GG	3	4.12205	2								GG	3	6.79759
77	GG	3	3.0575	2								GG	3	2.66649
79	GG	3	4.99723	2								GG	3	3.4571
81	GG	3	4.26082	2								GG	3	4.68784
82	GG	3	4.00325	2								GG	3	5.20283
86	GG	3	14.7807	2								AA	1	7.39
95	GG	3	4.57866	2								AA	1	4.59
96	GG	3	4.69809	2
98	GG	3	4.69809	2
99	GG	3	5.09712	2
101	GG	3	5.19711	2
106	GG	3	8.19739	2
109	GG	3	5.09712	2
112	GG	3	1.44601	2
113	GG	3	2.62115	2
114	GG	3	6.35396	2
116	GG	3	5.8917	2
120	GG	3	4.73876	2
121	GG	3	5.28119	2
124	GG	3	4.36005	2
125	GG	3	5.28119	2
127	GG	3	3.91524	2
128	GG	3	4.11163	2
129	GG	3	2.94125	2
130	GG	3	6.60248	2
131	GG	3	2.26311	2
135	GG	3	6.79759	2
139	GG	3	2.66649	2
140	GG	3	3.4571	2
141	GG	3	4.68784	2
143	GG	3	5.20283	2
115	AA	1	7.39	2
119	AA	1	4.59	2
